# Supplementary material for: Metabolic Profiling as a Screening Tool for Cytotoxic Compounds: Identification of 3-Alkyl Pyridine Alkaloids from Sponges Collected at a Shallow Water Hydrothermal Vent Site North of Iceland
Source: PubMed Central journal article supplement (PMC5334632; doi:10.3390/md15020052), 2017-02-22
Supplement: marinedrugs-15-00052-s001.pdf [file marinedrugs-15-00052-s001.pdf]

# Supplementary Materials: Metabolic Profiling as a Screening Tool for Cytotoxic Compounds: Identification of 3-Alkyl Pyridine Alkaloids from Sponges Collected at a Shallow Water Hydrothermal Vent Site North of Iceland

Eydis Einarsdottir, Manuela Magnusdottir, Giuseppe Astarita, Matthias Köck, Helga M. Ögmundsdottir, Margret Thorsteinsdottir, Hans Tore Rapp, Sesselja Omarsdottir, and Giuseppe Paglia

**Figure S1.** Mass fragmentation of haliclamine A induced by ESIMS (positive mode) on Waters Synapt (QTOF).

**Figure S2.** Mass fragmentation of haliclamine C induced by ESIMS (positive mode) on Waters Synapt (QTOF).

**Figure S3.** Mass fragmentation of haliclamine D induced by ESIMS (positive mode) on Waters Synapt (QTOF).

**Figure S4.** Mass fragmentation of haliclamine E induced by ESIMS (positive mode) on Waters Synapt (QTOF).

**Figure S5.** Mass fragmentation of haliclamine H induced by ESIMS (positive mode) on Waters Synapt (QTOF).

**Figure S6.** Mass fragmentation of cyclostelletamine P induced by ESIMS (positive mode) on Waters Synapt (QTOF).

**Figure S7.** Mass fragmentation of cyclostelletamine Q induced by ESIMS (positive mode) on Waters Synapt (QTOF).

**Figure S8.** Mass fragmentation of cyclostelletamine N induced by ESIMS (positive mode) on Waters Synapt (QTOF).

**Figure S9.** Mass fragmentation of cyclostelletamine G induced by ESIMS (positive mode) on Waters Synapt (QTOF).

**Figure S10.** Mass fragmentation of viscosamine C induced by ESIMS (positive mode) on Waters Synapt (QTOF).

**Figure S11.** Mass fragmentation of viscosaline B2 induced by ESIMS (positive mode) on Waters Synapt (QTOF).

**Figure S12.** Mass fragmentation of viscosaline C induced by ESIMS (positive mode) on Waters Synapt (QTOF).

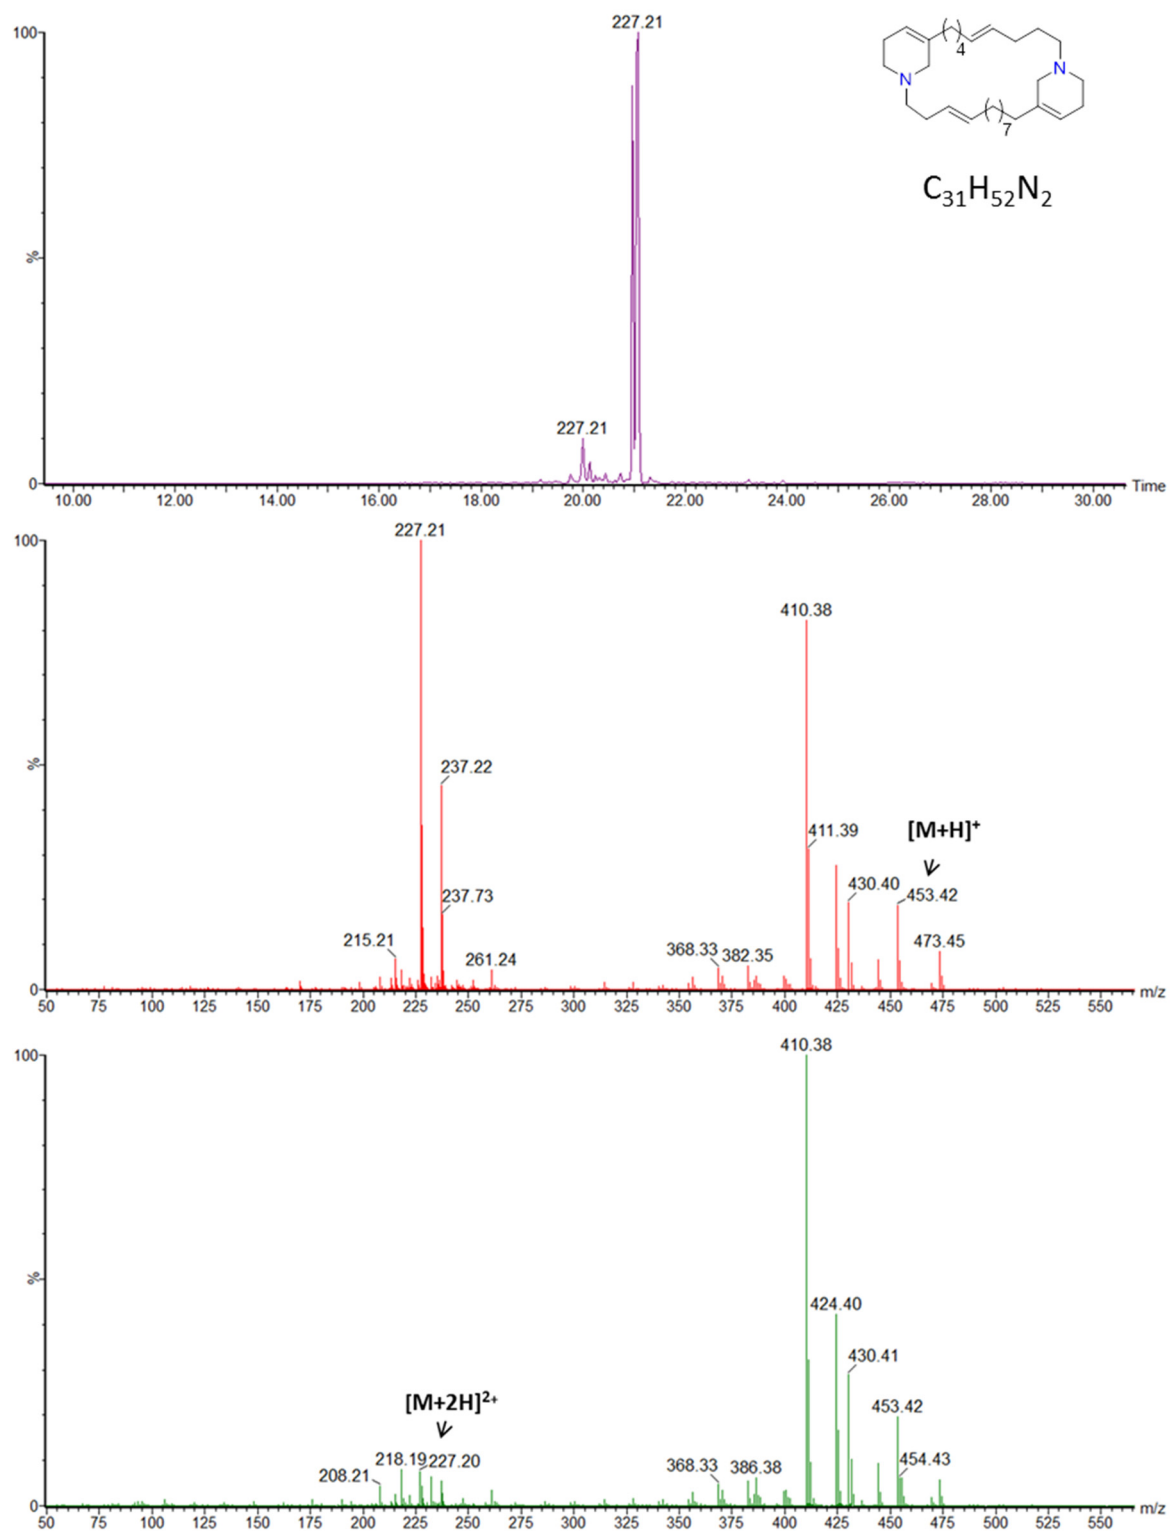

**Figure S1.** Mass fragmentation of haliclamine A induced by ESIMS (positive mode) on Waters Synapt (QTOF).

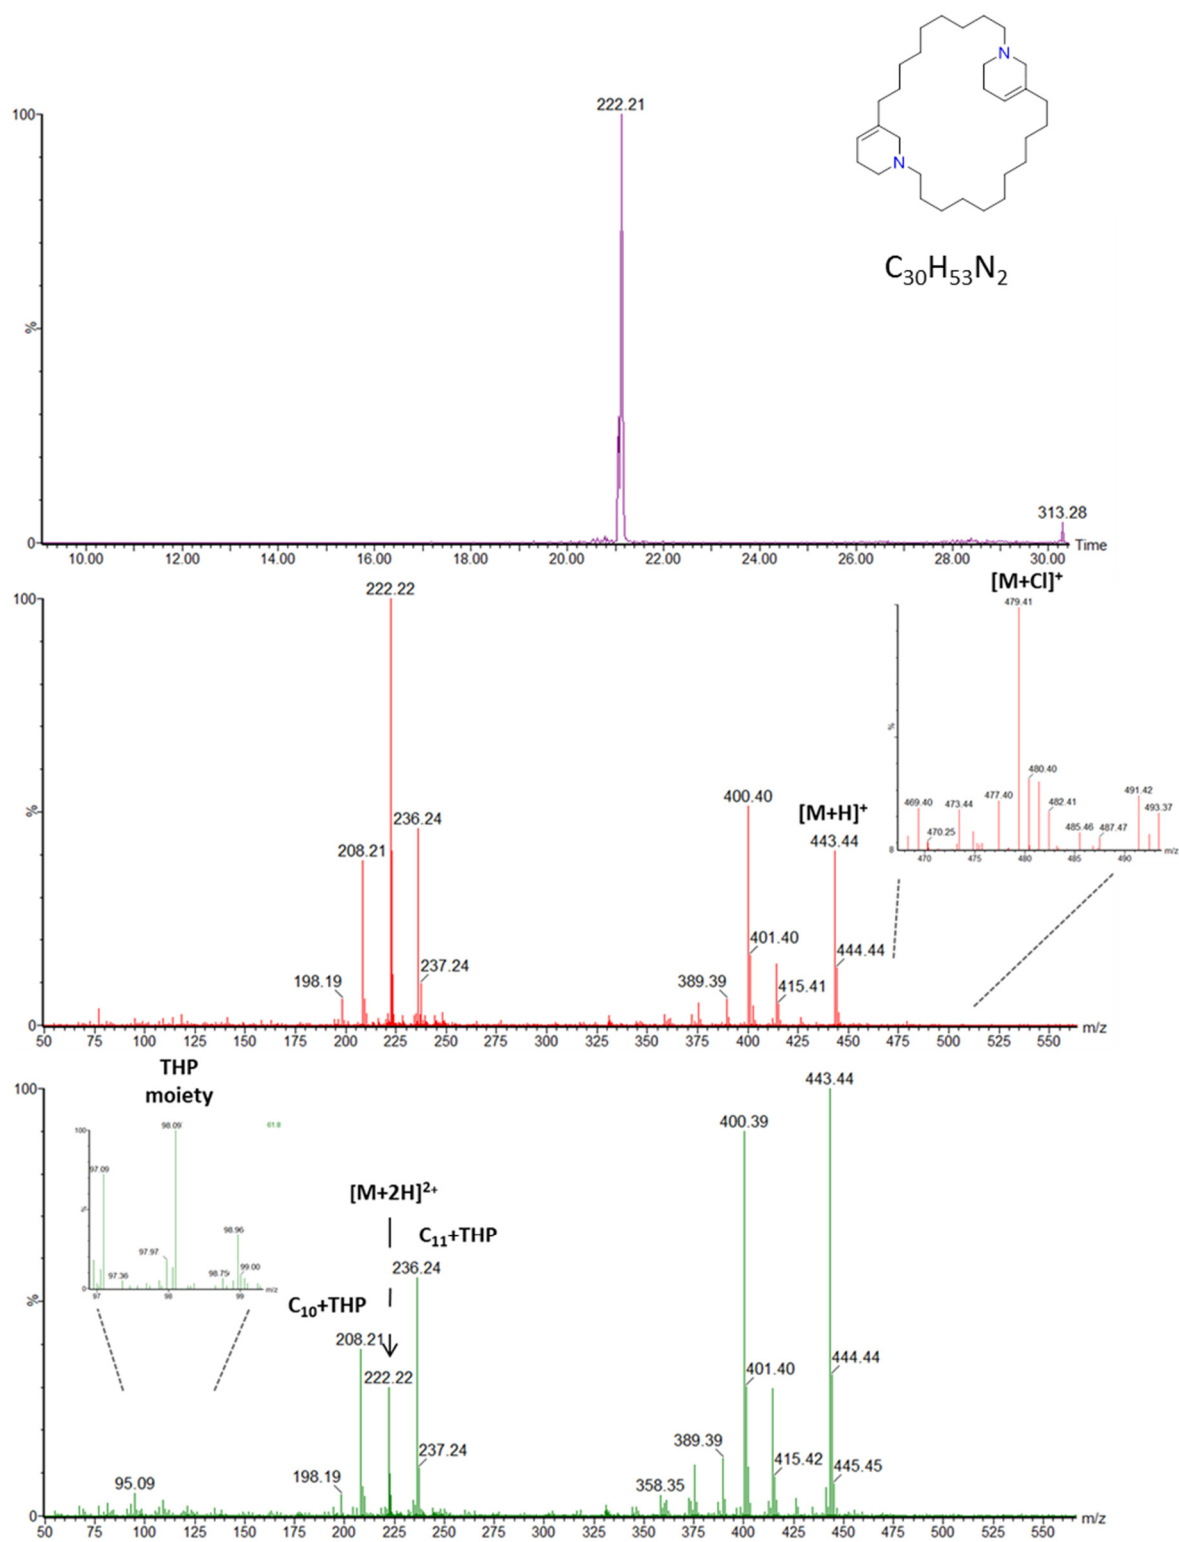

**Figure S2.** Mass fragmentation of haliclamine C induced by ESIMS (positive mode) on Waters Synapt (QTOF).

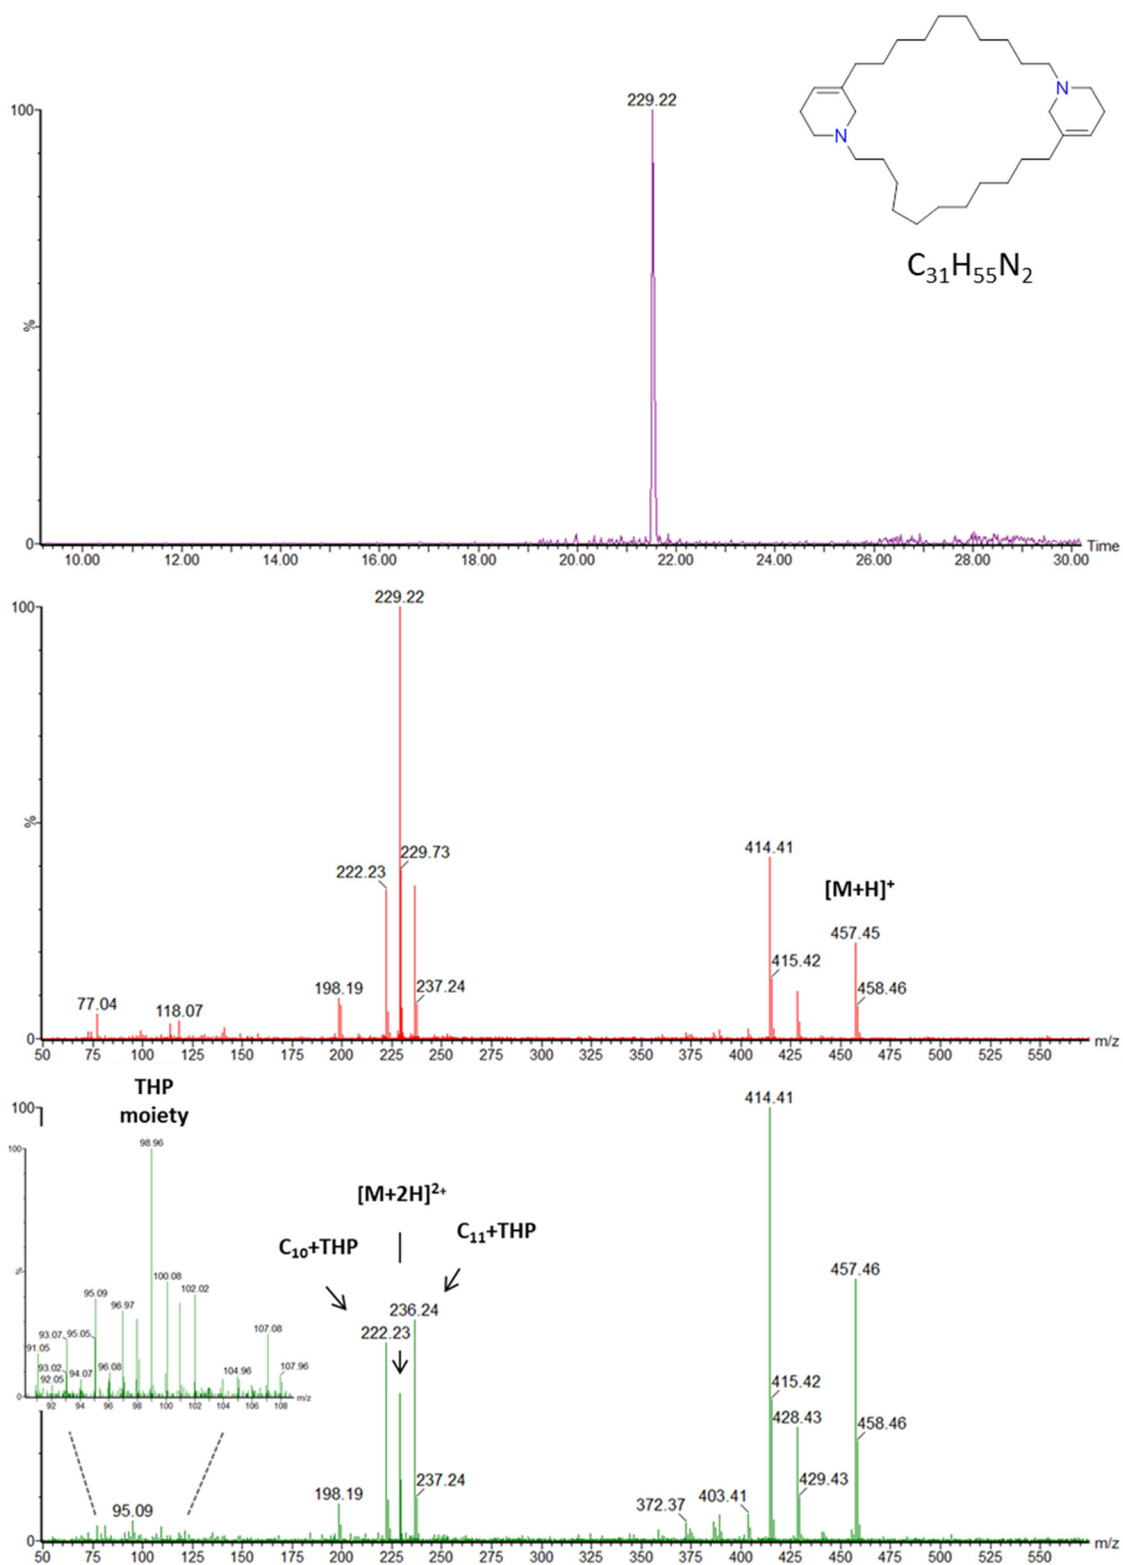

**Figure S3.** Mass fragmentation of haliclamine D induced by ESIMS (positive mode) on Waters Synapt (QTOF).

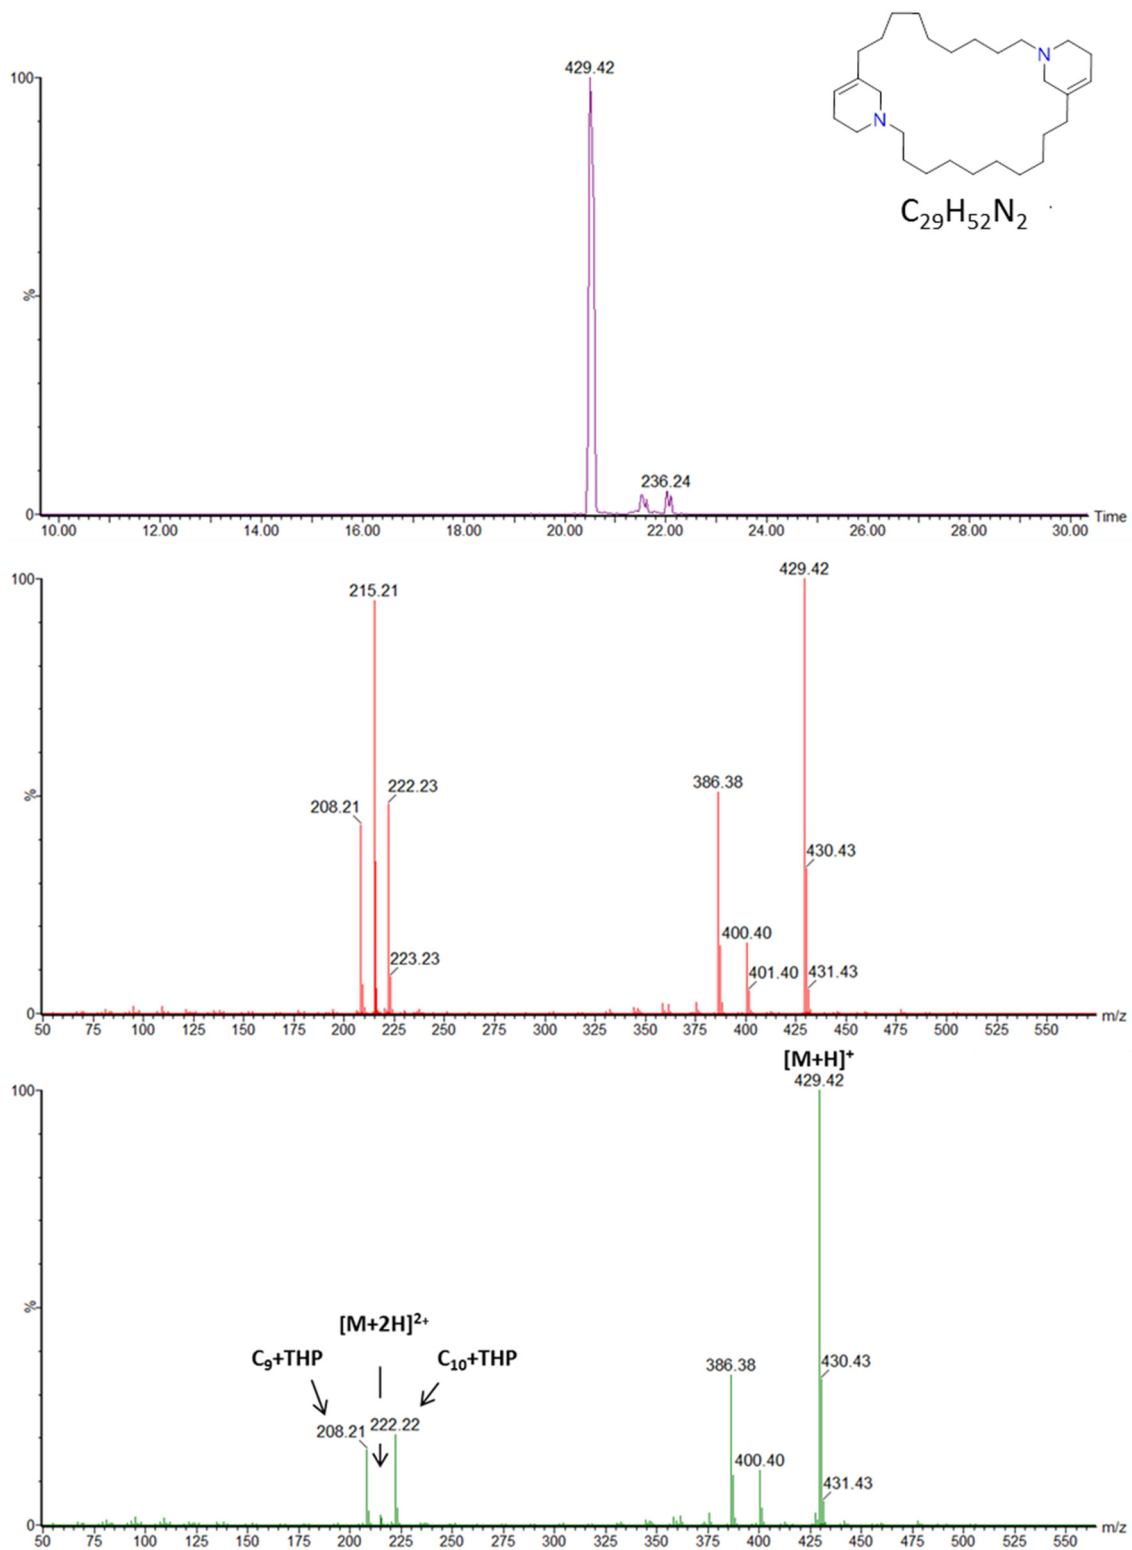

**Figure S4.** Mass fragmentation of haliclamine E induced by ESIMS (positive mode) on Waters Synapt (QTOF).

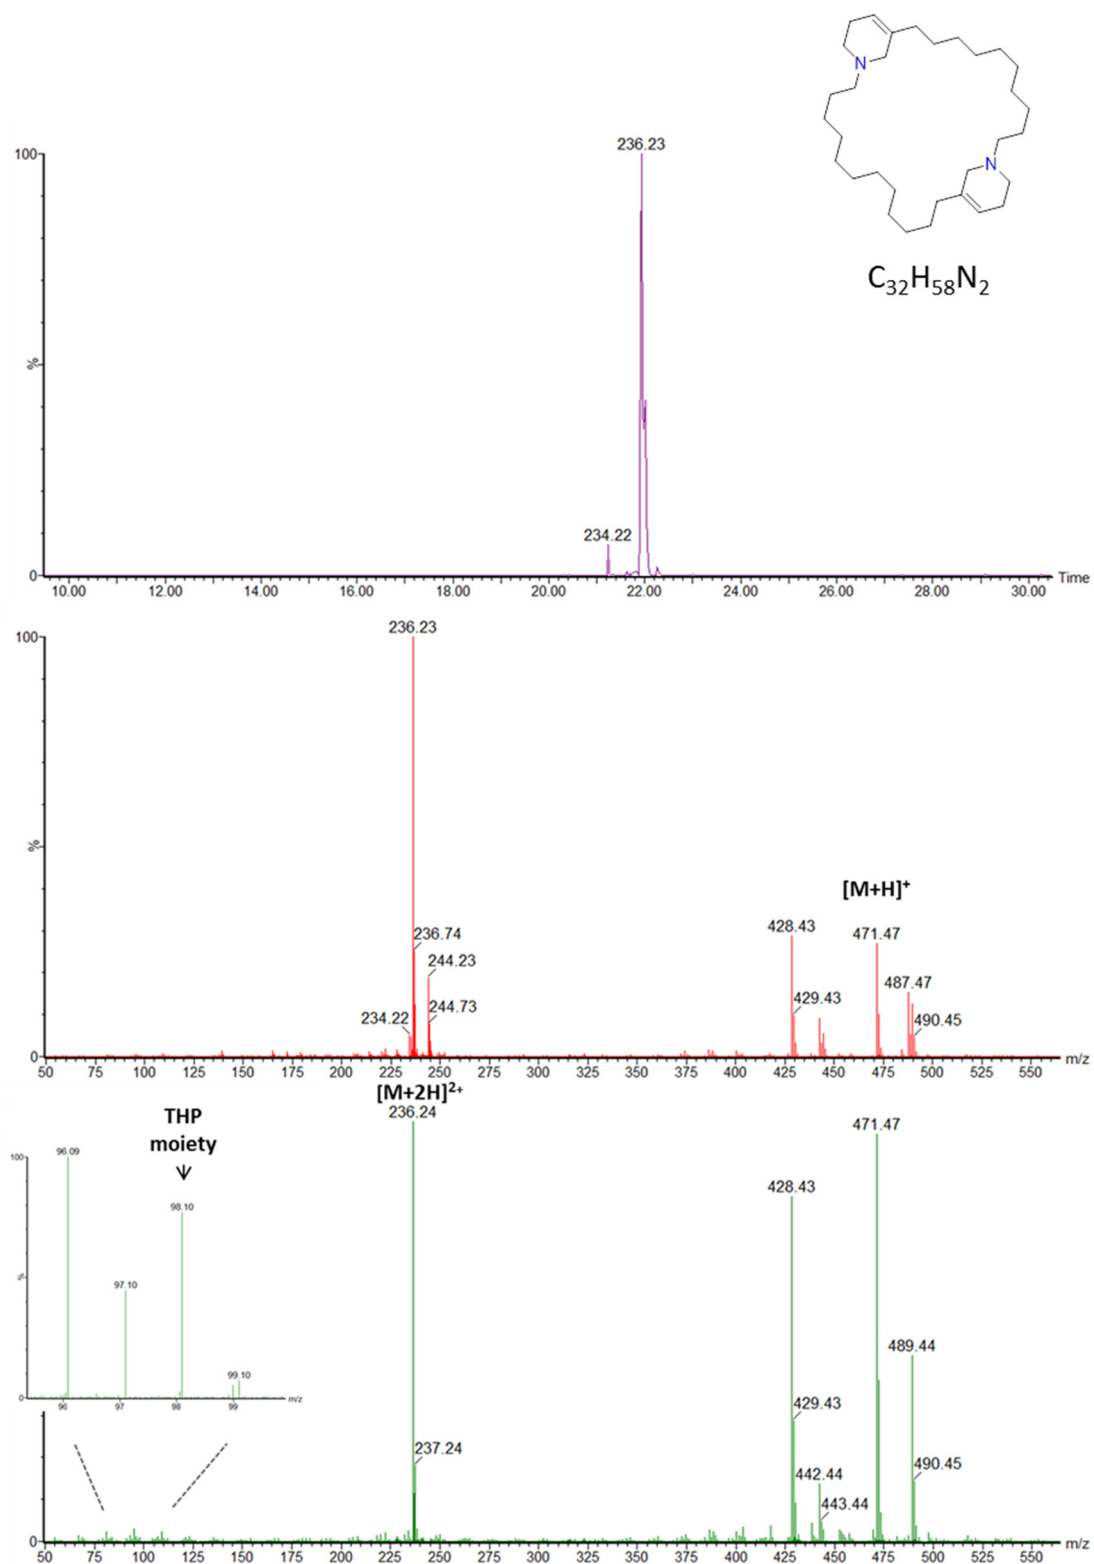

**Figure S5.** Mass fragmentation of haliclamine H induced by ESIMS (positive mode) on Waters Synapt (QTOF).

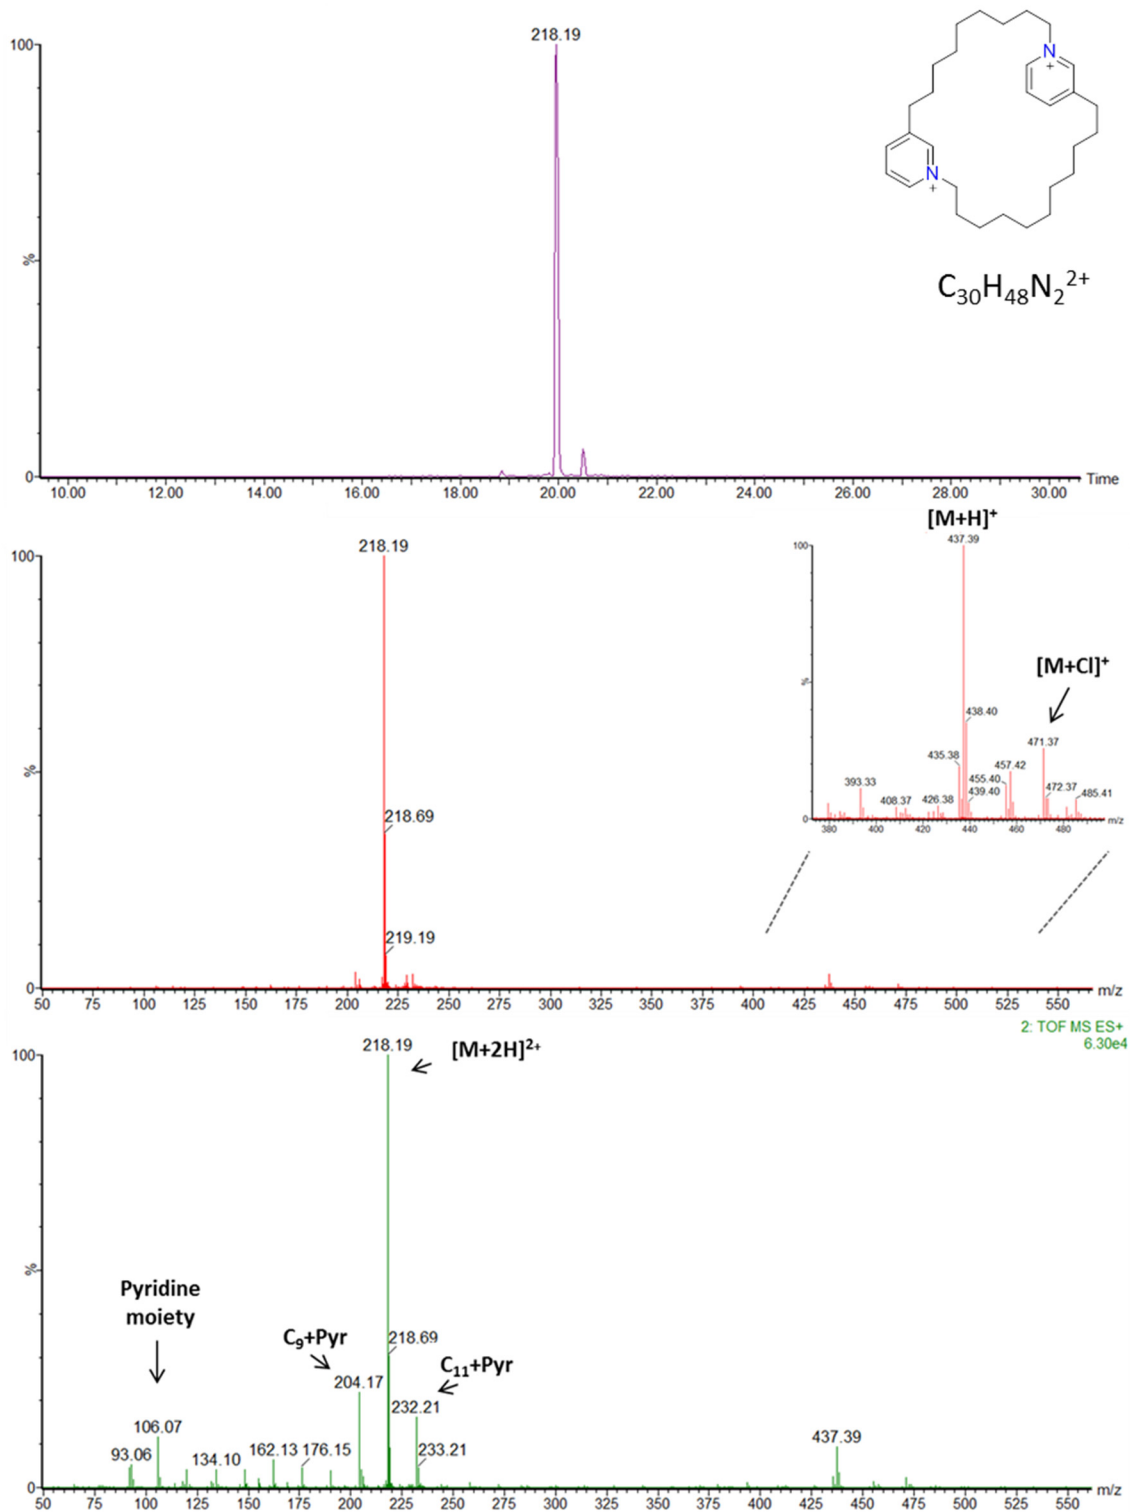

**Figure S6.** Mass fragmentation of cyclostelletamine P induced by ESIMS (positive mode) on Waters Synapt (QTOF).

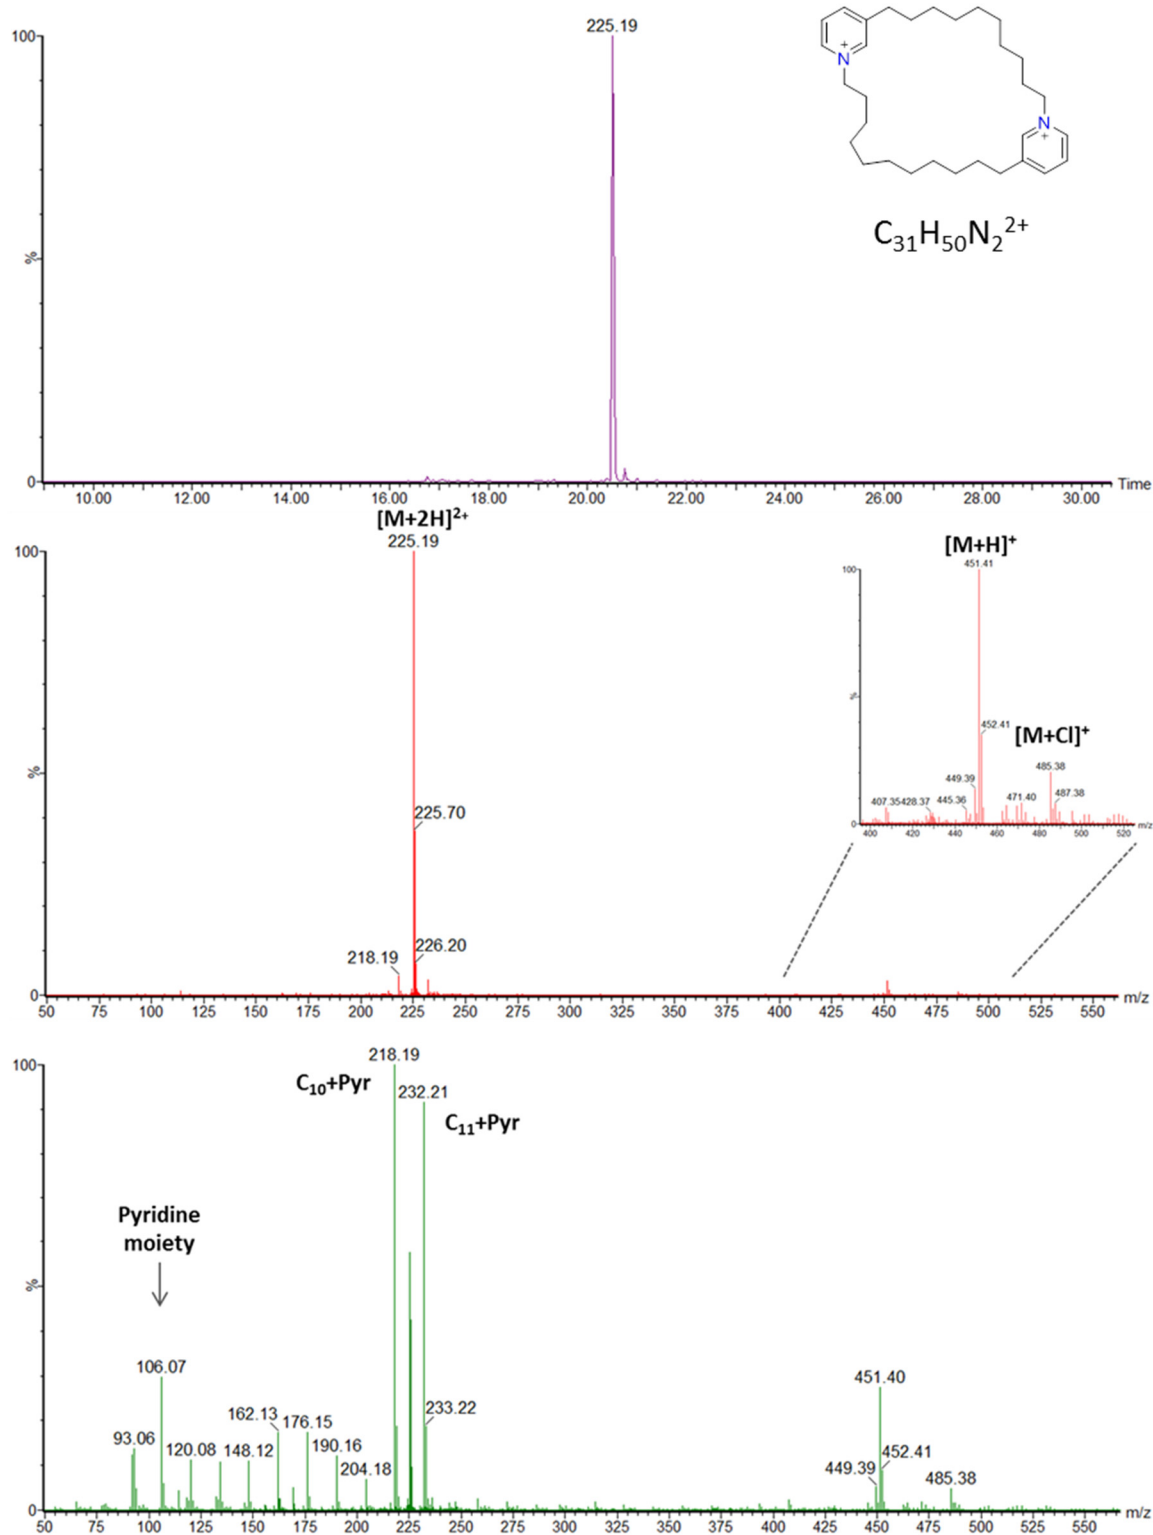

**Figure S7.** Mass fragmentation of cyclostelletamine Q induced by ESIMS (positive mode) on Waters Synapt (QTOF).



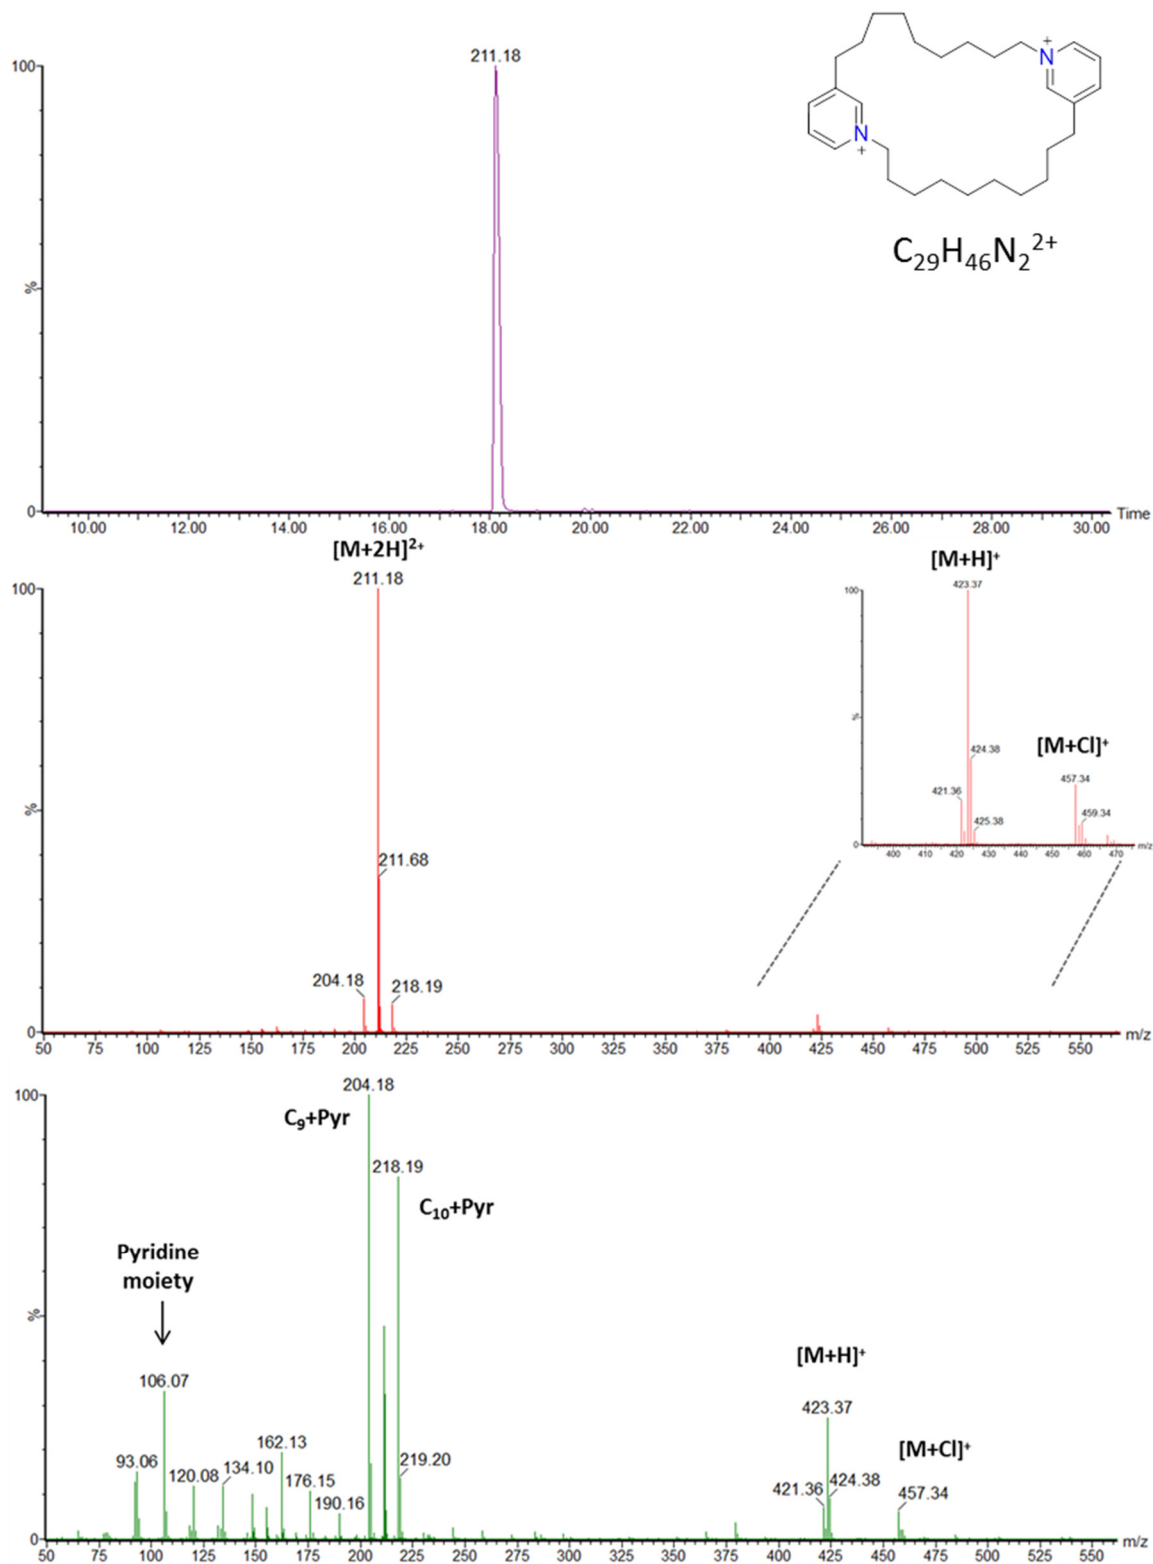

**Figure S8.** Mass fragmentation of cyclostelletamine N induced by ESIMS (positive mode) on Waters Synapt (QTOF).

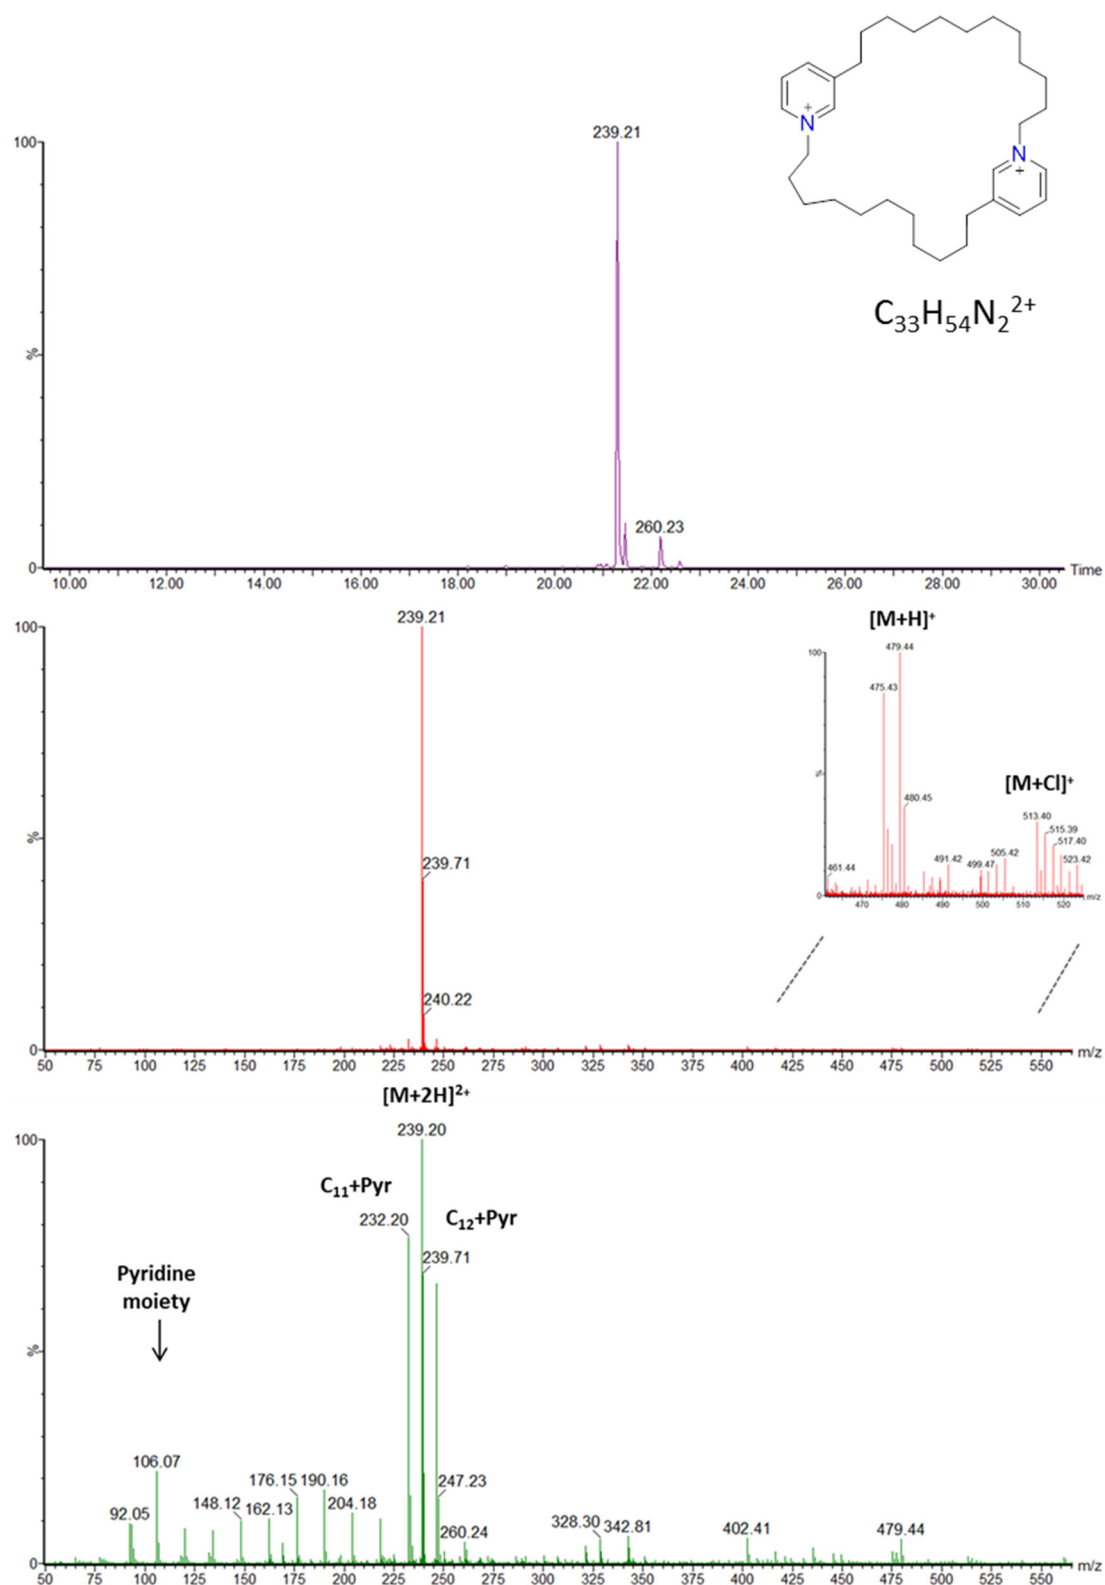

**Figure S9.** Mass fragmentation of cyclostelletamine G induced by ESIMS (positive mode) on Waters Synapt (QTOF).

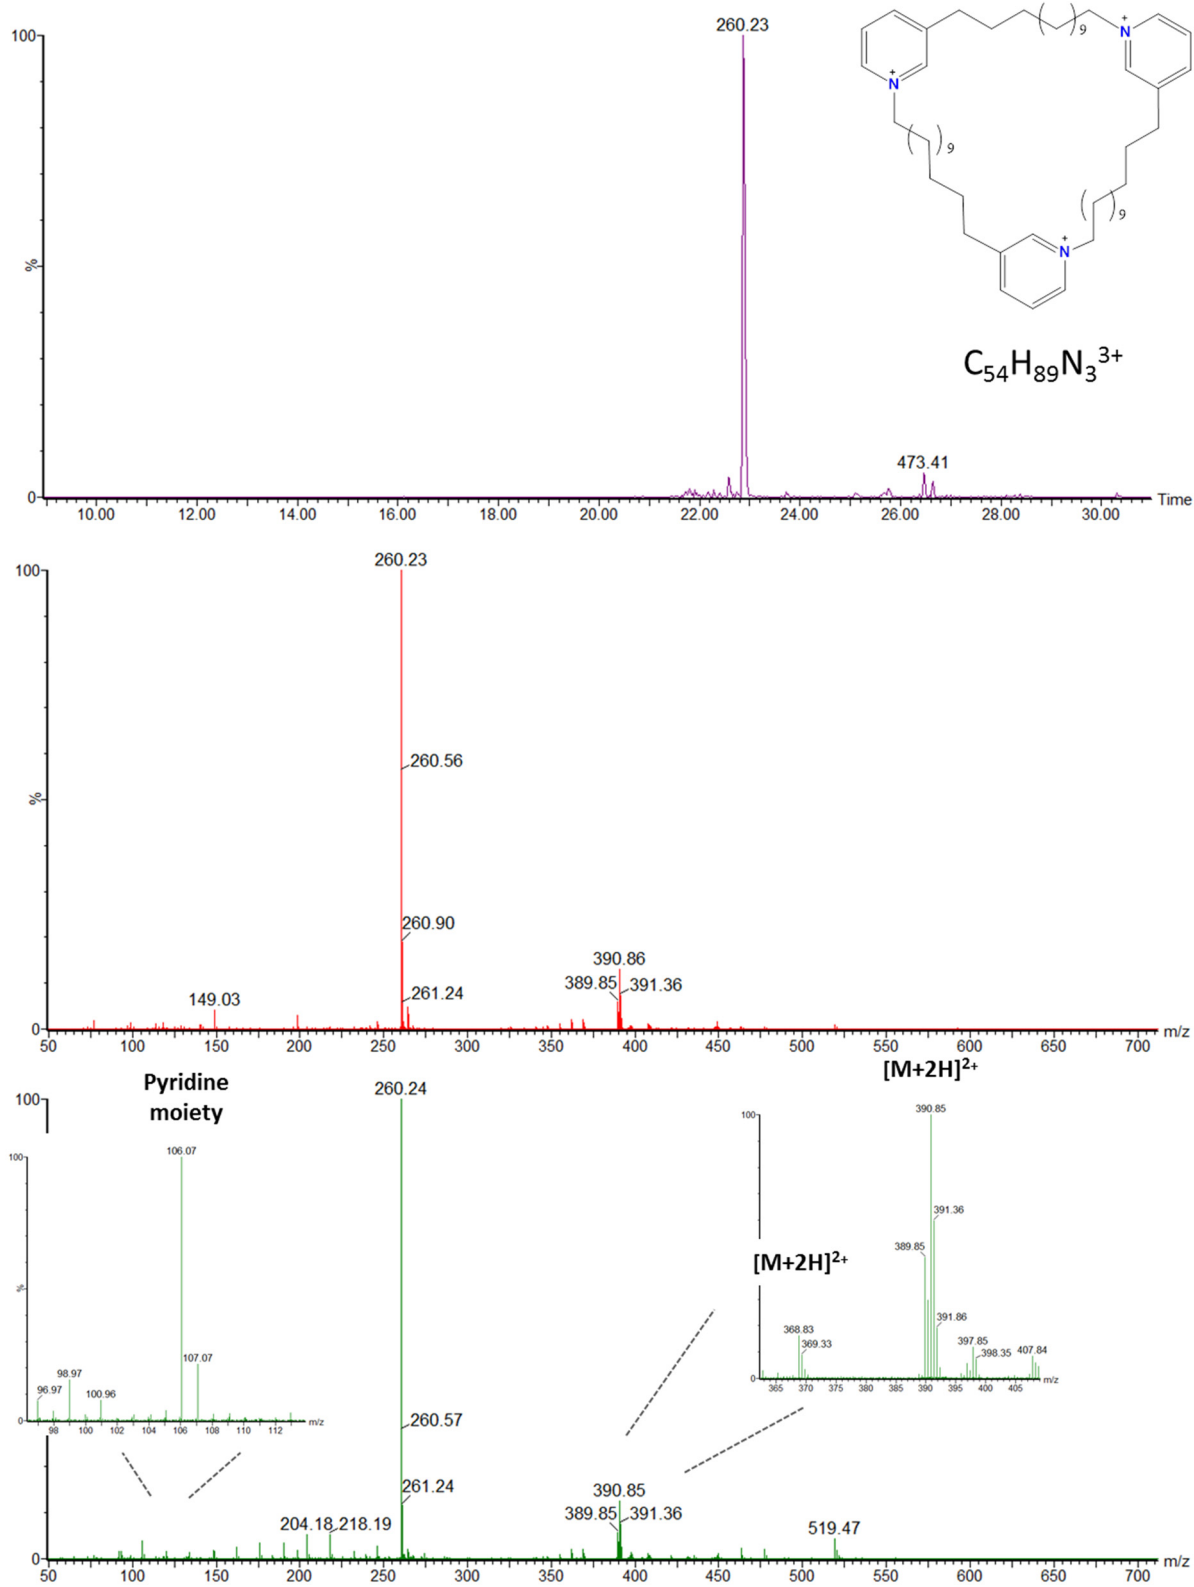

**Figure S10.** Mass fragmentation of viscosamine C induced by ESIMS (positive mode) on Waters Synapt (QTOF).

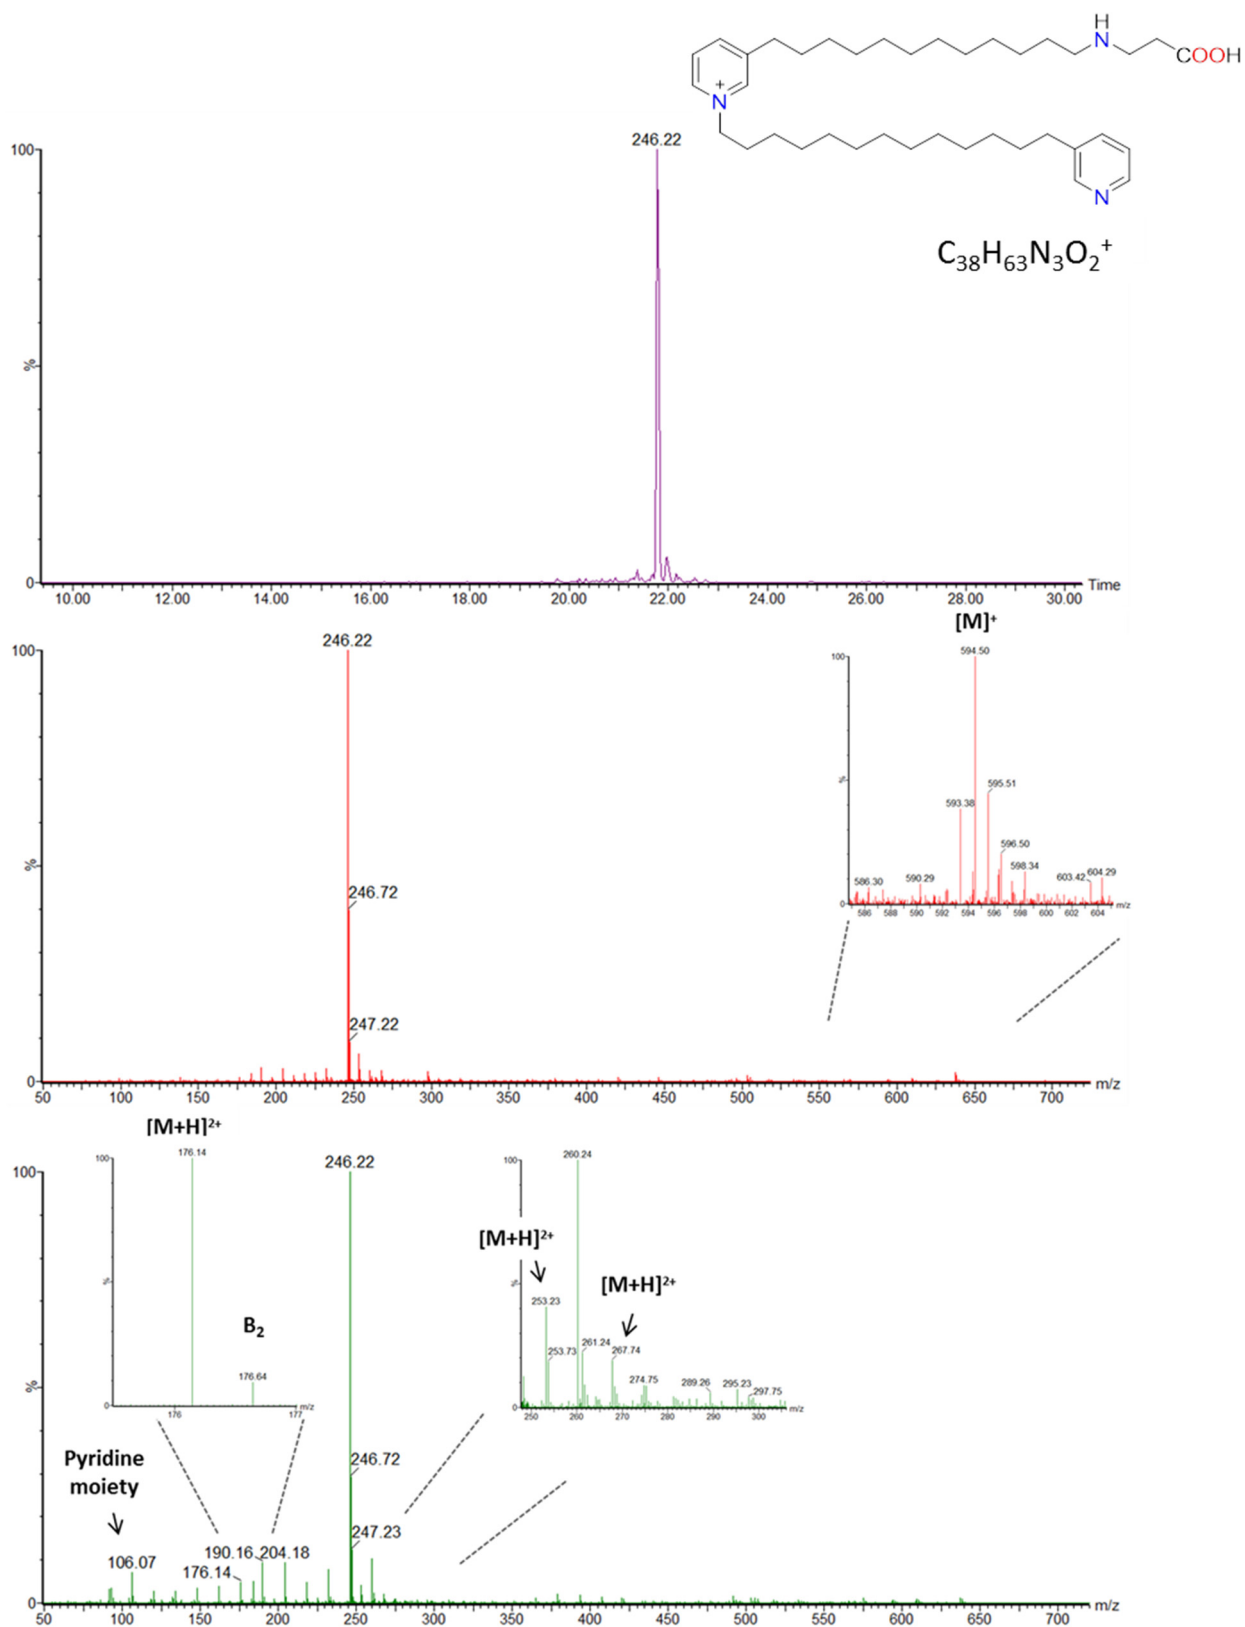

**Figure S11.** Mass fragmentation of viscosaline B2 induced by ESIMS (positive mode) on Waters Synapt (QTOF).

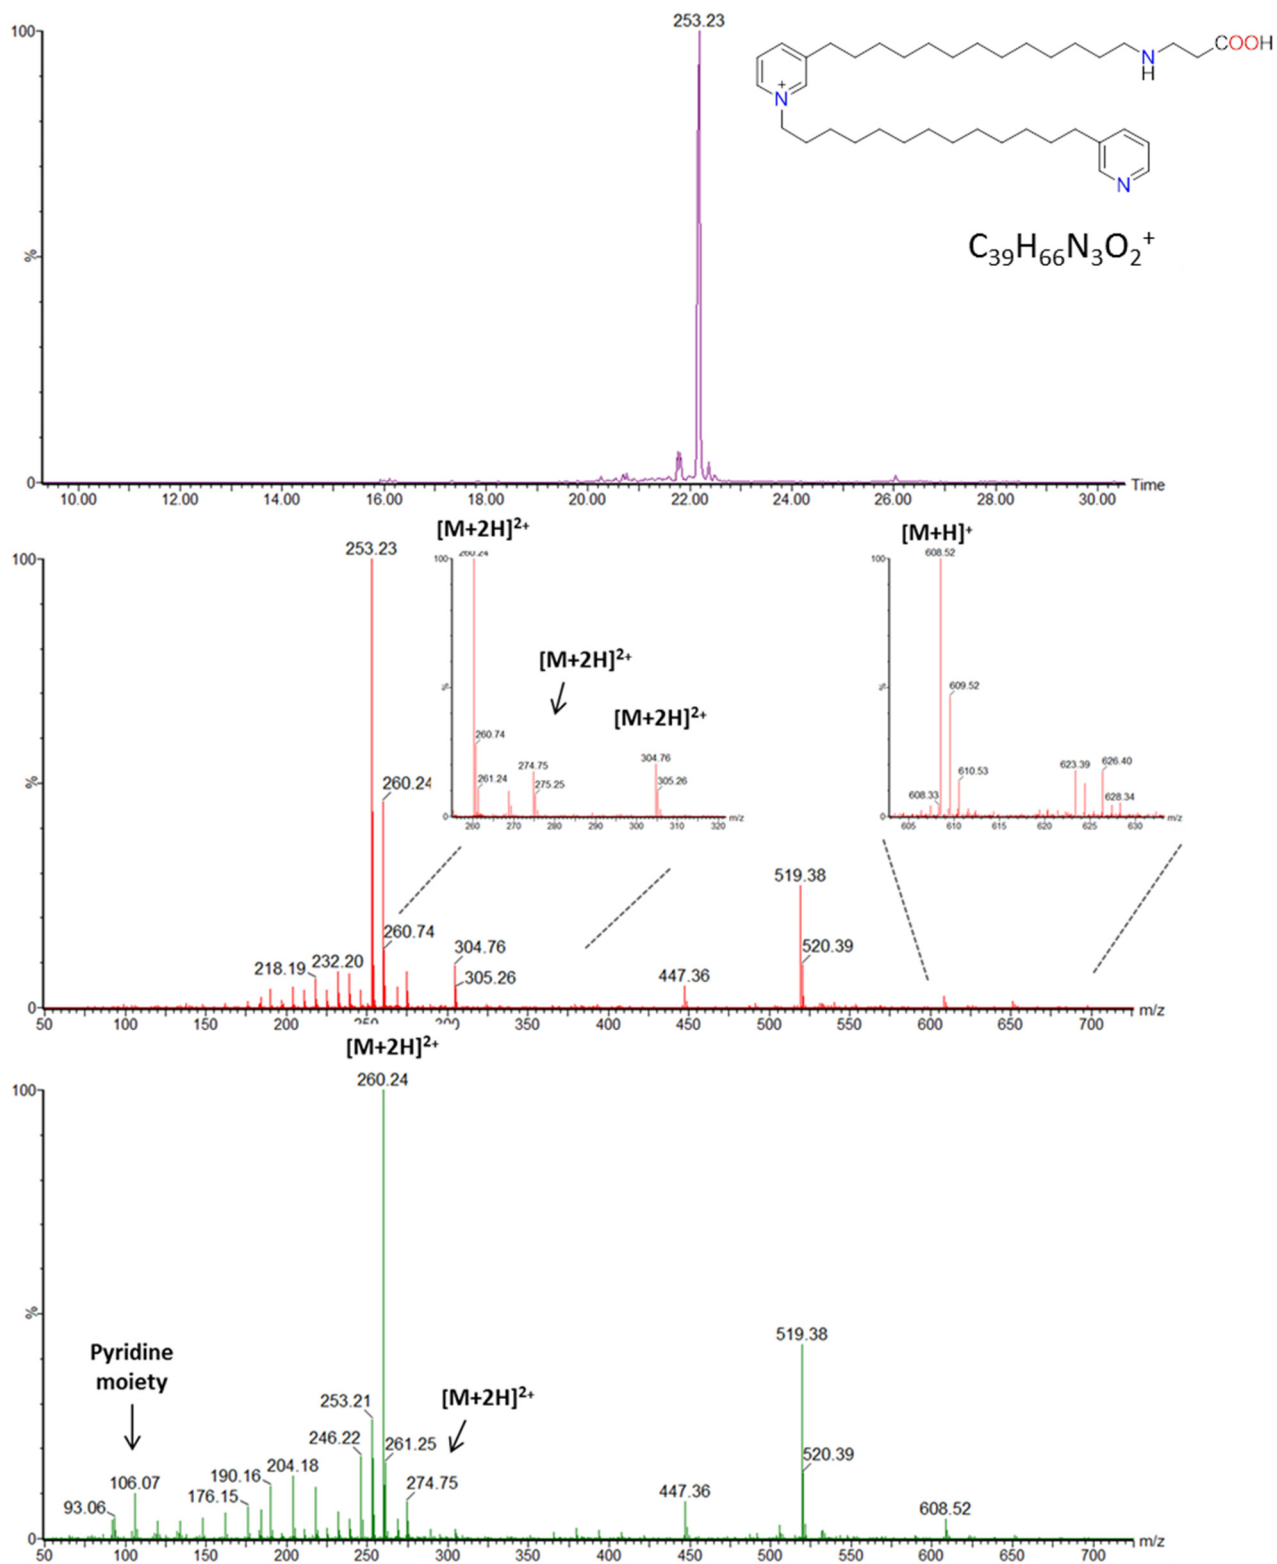

**Figure S12.** Mass fragmentation of viscosaline C induced by ESIMS (positive mode) on Waters Synapt (QTOF).
